# Supplementary material for: En route to controlled catalytic CVD synthesis of densely packed and vertically aligned nitrogen-doped carbon nanotube arrays
Source: publisher site journal article supplement (doi:10.3762/bjnano.5.24), 2014-03-03
Supplement: Additional file 1 [file 2190-4286-5-24-S1.pdf]

## **Supporting Information**

for

### **En route to controlled catalytic CVD synthesis of densely packed and vertically aligned nitrogen-doped carbon nanotube arrays**

Slawomir Boncel<sup>\*1</sup>, Sebastian W. Pattinson<sup>2</sup>, Valérie Geiser<sup>2</sup>, Milo S.P. Shaffer<sup>3</sup> and Krzysztof K.K. Koziol<sup>\*2</sup>

Address: <sup>1</sup>Department of Organic Chemistry, Biochemistry and Biotechnology, Silesian University of Technology, Krzywoustego 4, 44-100 Gliwice, Poland, <sup>2</sup>Department of Materials Science and Metallurgy, University of Cambridge, 27 Charles Babbage Road, Cambridge CB3 0FS, United Kingdom and <sup>3</sup>Imperial College London, Department of Chemistry, London SW7 2AZ, United Kingdom

Email: Slawomir Boncel\* - slawomir.boncel@polsl.pl;

Krzysztof K.K. Koziol\* - kk292@cam.ac.uk

\* Corresponding author

### **Additional experimental data**

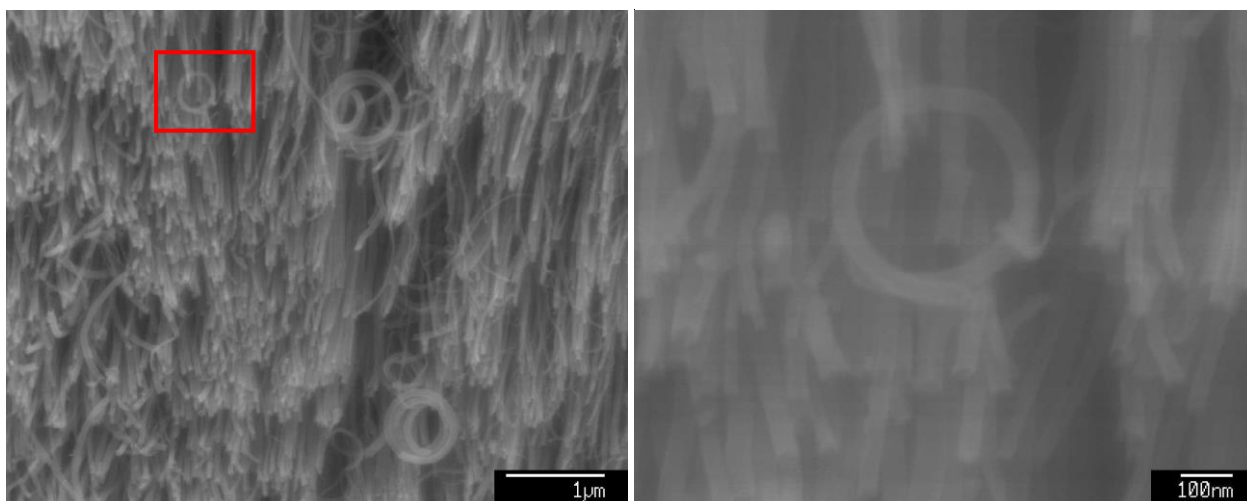

**Figure S1:** Spiral and some entangled N-CNTs (left) from *Synthesis V*, and magnification of indicated area.

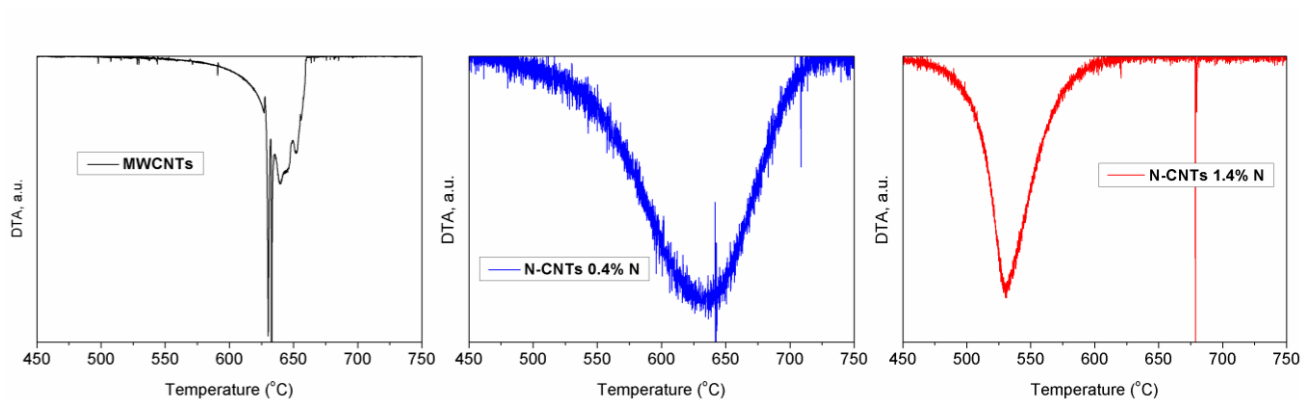

**Figure S2:** DTA curves for MWCNTs, N-CNTs (0.4% N) and N-CNTs (1.4% N). For MWCNTs of a high degree of inhomogeneity – various fractions (ca. five) of carbon and carbonaceous material undergoing combustion with a maximum rate at different temperatures; Contrarily, N-CNTs show a uniform behaviour when heated in air ( $10\text{ }^{\circ}\text{C}\cdot\text{min}^{-1}$ ) but are more susceptible to thermal degradation because of a high number of distortions/deformations of the graphene walls.

**Table S1:** Raman shifts of N-CNTs as a function of the time of synthesis as compared to MWCNTs; no significant changes either in position of the critical peaks or changes in the ratio  $I_D/I_G$  could be found throughout the course of synthesis.

|           | G'-Band       |          |                     | G-Band     |        |                  | D-Band     |        |                  | $I_D/I_G$ |
|-----------|---------------|----------|---------------------|------------|--------|------------------|------------|--------|------------------|-----------|
|           | $\omega_{G'}$ | $I_{G'}$ | $\Delta\omega_{G'}$ | $\omega_G$ | $I_G$  | $\Delta\omega_G$ | $\omega_D$ | $I_D$  | $\Delta\omega_D$ |           |
| N-CNTs_1h | 2645.8        | 780.2    | 7.4                 | 1573.6     | 1393.9 | -1.5             | 1333.9     | 1211.5 | 7.5              | 0.87      |
| N-CNTs_2h | 2647.0        | 508.4    | 8.6                 | 1572.1     | 925.9  | -2.9             | 1333.9     | 841.2  | 7.5              | 0.91      |
| N-CNTs_3h | 2671.6        | 559.0    | 33.2                | 1582.3     | 1171.0 | 7.3              | 1327.9     | 1162.6 | 1.5              | 0.99      |
| N-CNTs_4h | 2660.5        | 629.2    | 22.2                | 1575.0     | 1232.8 | 0.0              | 1329.4     | 1160.1 | 3.0              | 0.94      |
| MWCNTs    | 2638.4        | 3632.0   | 0.0                 | 1575.0     | 3075.7 | 0.0              | 1326.4     | 1313.9 | 0.0              | 0.43      |

**Table S2:** List of graphite-derived XRD reflections acquired from N-CNTs vs MWCNTs.

| MWCNTs               |                                   |       | N-CNTs               |                                   |       |
|----------------------|-----------------------------------|-------|----------------------|-----------------------------------|-------|
| Normalised intensity | Bragg angle ( $^{\circ}2\theta$ ) | $hkl$ | Normalised intensity | Bragg angle ( $^{\circ}2\theta$ ) | $hkl$ |
| 100                  | 25.8                              | 002   | 100                  | 26.3                              | 002   |
| 2                    | 42.3                              | 100   | 9                    | 42.2                              | 100   |
| 2                    | 53.7                              | 004   | 3                    | 54.6                              | 004   |
